# Supplementary material for: Interaction between parasite-encoded JAB1/CSN5 and macrophage migration inhibitory factor proteins attenuates its proinflammatory function
Source: PubMed Central journal article supplement (PMC6035221; doi:10.1038/s41598-018-28625-1), 2018-07-06

## **Supplementary Information**

### **Interaction between parasite-encoded JAB1/CSN5 and macrophage migration inhibitory factor proteins attenuates its proinflammatory function**

Swagata Ghosh<sup>1</sup>, Laura Ann Leaton<sup>1</sup>, Laura Farr<sup>1</sup>, Alexis Barfield<sup>2</sup> and Shannon Moonah<sup>1\*</sup>

<sup>1</sup>Department of Medicine, University of Virginia, Charlottesville, Virginia, USA

<sup>2</sup>National Cancer Institute, National Institutes of Health, Bethesda, Maryland, USA

\*correspondence author [sm5fe@virginia.edu](mailto:sm5fe@virginia.edu)

| <b>Protein</b>                               | <b>Gene ID</b> | <b><u>Protein Identification Probability</u></b> | <b><u>Percent Coverage</u></b> |
|----------------------------------------------|----------------|--------------------------------------------------|--------------------------------|
| Ribosomal Proteins*                          | EHI_073600     | 100%                                             | 62%                            |
| Macrophage Migration Inhibitory Factor (MIF) | EHI_092370     | 100%                                             | 54%                            |
| Histone <sup>#</sup>                         | EHI_182990     | 100%                                             | 41%                            |
| Copine                                       | EHI_140260     | 100%                                             | 38%                            |
| Ribonucleoprotein complex subunit 4          | EHI_115300     | 100%                                             | 36%                            |
| JAB1/CSN5                                    | EHI_050500     | 100%                                             | 33%                            |
| Molybdenum cofactor sulfurase                | EHI_027700     | 100%                                             | 33%                            |
| Sulfate adenylyltransferase                  | EHI_197160     | 100%                                             | 32%                            |
| Inorganic pyrophosphatase                    | EHI_124880     | 100%                                             | 32%                            |
| Skp1                                         | EHI_066770     | 100%                                             | 31%                            |

**Figure. S1** Top proteins detected by mass spectrometry. \*Represents 40S ribosomal protein S15a. <sup>#</sup>Represents histone H2B.

| Name                | ID% w/<br>Hu-JAB1 | Sim% w/<br>Hu-JAB1 | Length<br>(aa) | MW(Da) | IP   |
|---------------------|-------------------|--------------------|----------------|--------|------|
| Human               | 100%              | 100%               | 334            | 37.5   | 6.1  |
| <i>Entamoeba</i>    | 39%               | 61%                | 318            | 36.5   | 5.35 |
| <i>Toxoplasma</i>   | 41%               | 54%                | 489            | 53.6   | 5.61 |
| <i>Trypanosoma</i>  | 35%               | 53%                | 398            | 44.7   | 6.19 |
| <i>Leishmania</i>   | 34%               | 53%                | 473            | 51.4   | 7.72 |
| <i>Acanthamoeba</i> | 71%               | 79%                | 311            | 34.8   | 5.87 |
| <i>Naegleria</i>    | 75%               | 85%                | 310            | 34.8   | 6.56 |

**Figure. S2** Human JAB1/CSN5 (ENSG00000121022) orthologues in parasites: *Entamoeba histolytica* (EHI\_050500), *Toxoplasma gondii* (TGARI\_308590), *Trypanosoma Cruzi* (TcCLB.507083.60), *Leishmania donovani* (LBRM2903\_160015100), *Acanthamoeba castellanii* (ACA1\_074760), *Naegleria fowleri* (NF0060740). Listed are the level of their sequence identity and similarity with the human protein, length of amino acid sequence, molecular weight and isoelectric point.

|                     |                        |
|---------------------|------------------------|
| Human               | EMVVGWYHSHPGFGCWLSGVD  |
| <i>Entamoeba</i>    | ESIVGWYHSHPGFGCWLS SID |
| <i>Trypanosoma</i>  | EKVVGWYHSHPGFGCWLSGED  |
| <i>Leishmania</i>   | ENVVGWYHSHPGFGCWLS SED |
| <i>Toxoplasma</i>   | EMVVGWYHSHPGFGCWFSGTD  |
| <i>Acanthamoeba</i> | EMVVGWYHSHPGFGCWLSGVD  |
| <i>Naegleria</i>    | EMVVGWYHSHPGFGCWLS SVD |

**Figure.S3** Alignment of the conserved JAMM motif of RPN11 from human (ENSG00000115233) and pathogenic parasites: *Entamoeba histolytica* (EHI\_164750), *Toxoplasma gondii* (TGARI\_269840), *Trypanosoma Cruzi* (TcCLB.503697.9), *Leishmania donovani* (LBRM2903\_200012600), *Acanthamoeba castellanii* (ACA1\_073080), *Naegleria fowleri* (NF0076640). Identical (green), conserved (blue), semi-conserved (pink), and non-conserved residues (red).

| #  | Sequence                                 | Use                                       |
|----|------------------------------------------|-------------------------------------------|
| 1  | 5' ACCCATGAAGCCTGCTTTTTTGTACAAA 3'       | Δ3-50 <i>EhJAB1</i><br>(Δ1)               |
| 2  | 5' TGCTATGTTAGCAGCGTGGCA                 |                                           |
| 3  | 5' CTTTTTGAAATAATACGGATCTTTTTTCCACGG 3'  | Δ51-133 <i>EhJab1</i><br>(Δ2)             |
| 4  | 5' CATAGCCATCCGAGCTATAAATGTTGG 3'        |                                           |
| 5  | 5' ATACCAACCGCAAAACGGTTCITTTAAAACC 3'    | Δ134-147 <i>EhJab1</i><br>(Δ3)            |
| 6  | 5' GTTGCAACCGAAAACTGCATCAGAGC 3'         |                                           |
| 7  | 5' ATCAATACCGCTCAGCCAACATTTATAGCT 3'     | Δ148-187 <i>EhJab1</i><br>(Δ4)            |
| 8  | 5' GGTTTTAAACCGCAGCAGAAAGCC 3'           |                                           |
| 9  | 5' ATTCCGGAAAGGTACGAAAGGC 3'             | Δ187-318 <i>EhJab1</i><br>(Δ5)            |
| 10 | 5' AAGACCCAGCTTTCTTGTACAAAGTG 3'         |                                           |
| 11 | 5' ATGCCAGGGTATTAATCCAATATTCATGC3'       | Δ247-318 <i>EhJab1</i><br>(Δ6)            |
| 12 | 5' AAGACCCAGCTTTCTTGTACAAAGTG 3'         |                                           |
| 13 | 5' AACAAGTTTGTACAAAAAAGCAGGCTTC 3'       | pDEST15- <i>EhJAB1</i><br>deletion screen |
| 14 | 5' CACTTTGTACAAGAAAGCTGGGTCTTA 3'        |                                           |
| 15 | 5' AAAAAAGGATCCATGGGTGAAGAGGCAGCATATA 3' | 5'BamH1 -<br><i>EhJAB1</i> -<br>3' Xho1   |
| 16 | 5' AAAAAACTCGAGTTATTTGCCGGTCACTTTCTGA 3' |                                           |

**Figure. S4** Primers used for making the *EhJAB1* deletion constructs by inverse PCR (#1-12), screening of deletion constructs (#13-14) and sub-cloning of *EhJAB1* in pGEX-4T1 vector (#15-16) are described.

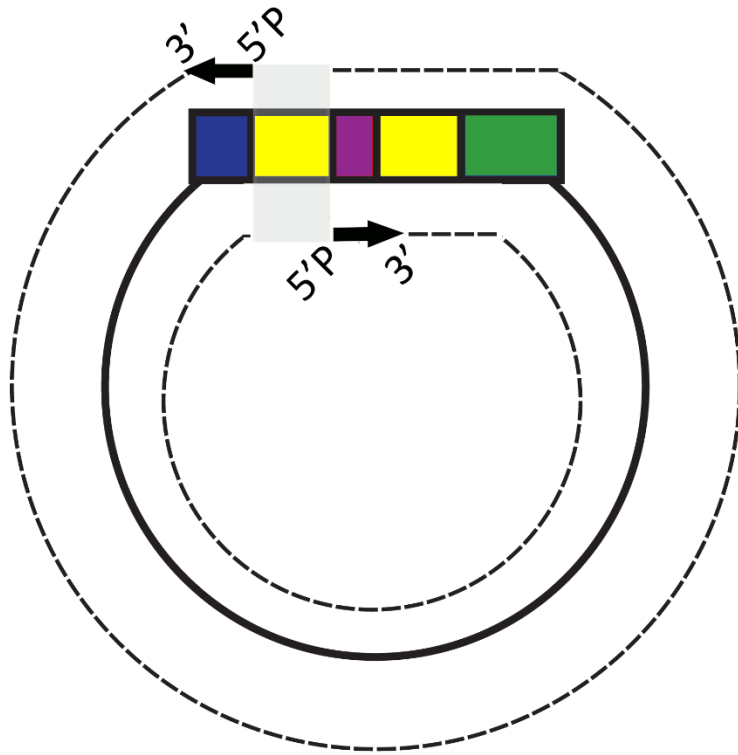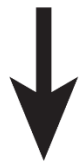

Dpnl Digestion  
(for clearing bacteria derived template)

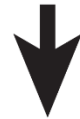

Self ligation

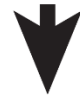

Transformation into *E. coli*

**Figure.S5** Schematic of the strategy and steps for making the deletion mutants of *EhJAB1*. Inverse PCR done with 5' phosphorylated primers.

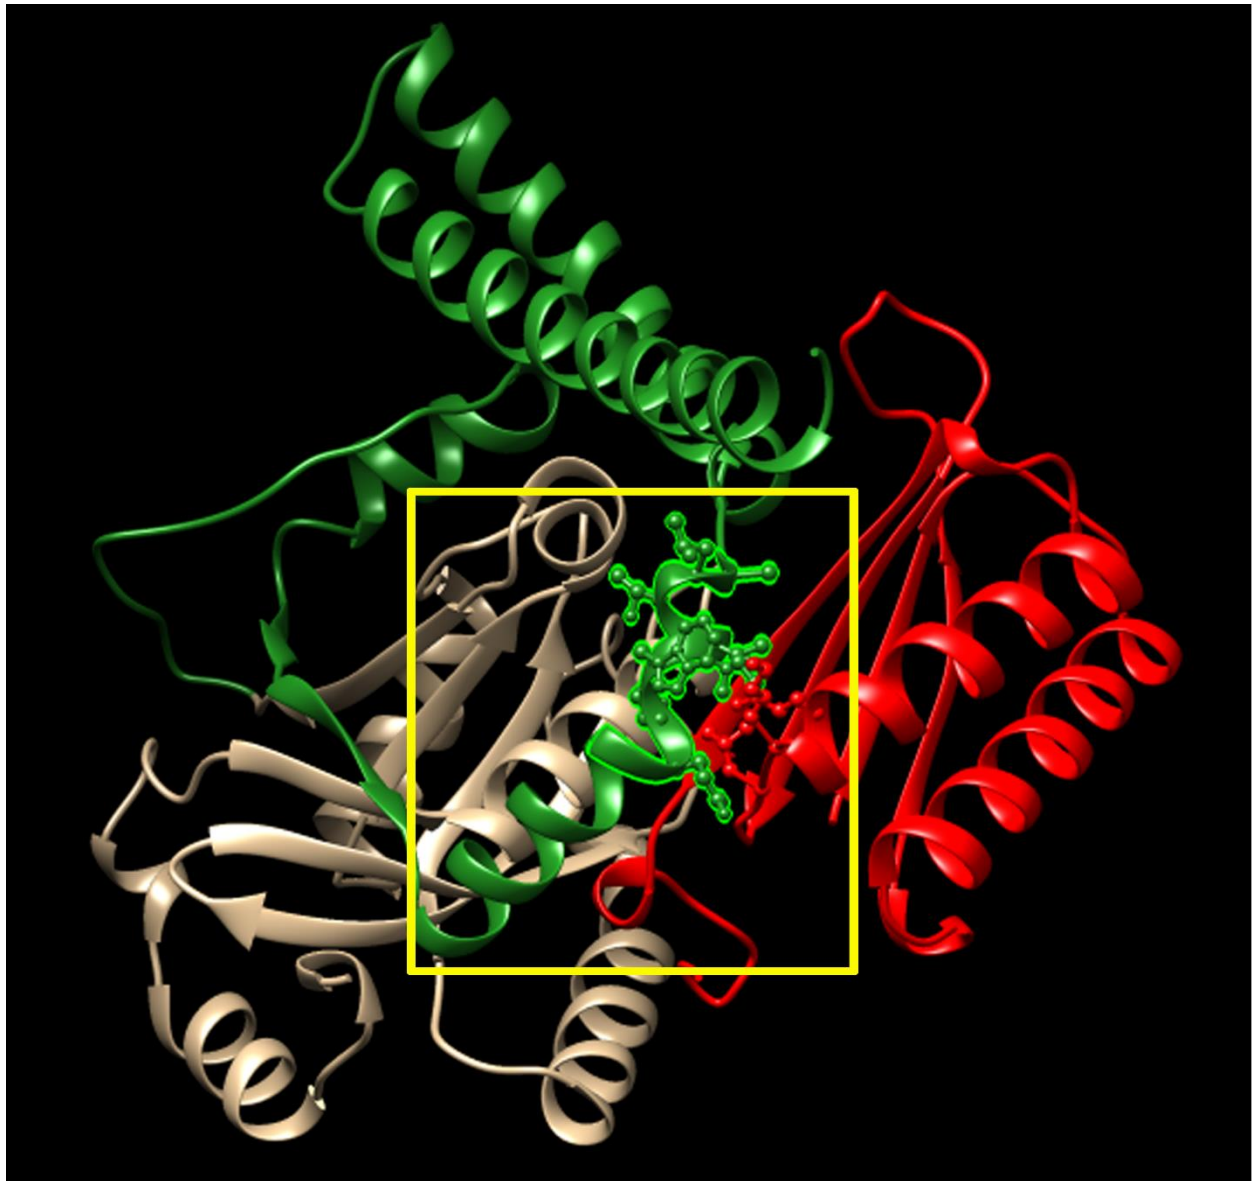

**Figure.S6** Predicted *EhMIF-EhJAB1* interaction. *EhMIF* (red), *EhJAB1* C-terminal region (green) and rest of the *EhJAB1* protein (grey). The yellow box illustrates the C-terminal region of  $\Delta 6$  *EhJAB1* mutant predicted to bind to *EhMIF*, and predicted *EhMIF* binding domain (64-69 aa) to *EhJAB1*.

Full-length gels and blots:

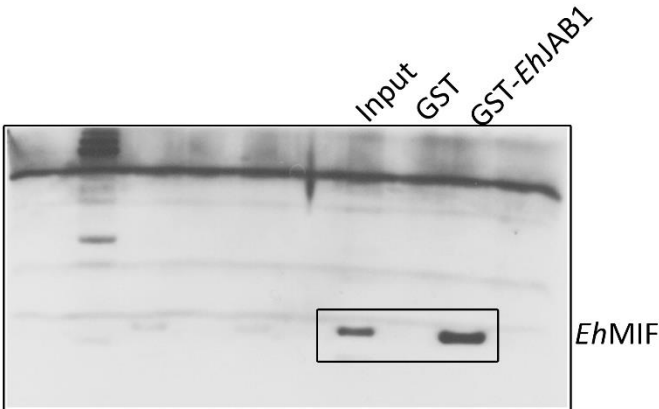

Figure 2C

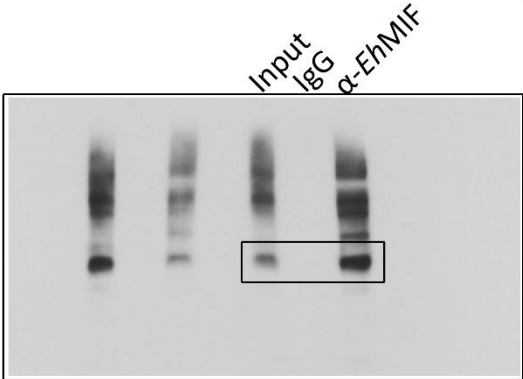

Figure 2E Top Panel

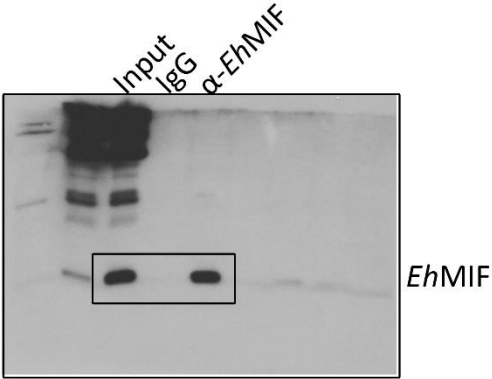

Figure 2E Bottom Panel



50nM *EhJAB1*<sup>B</sup>  
 0.5uM *EhJAB1*  
 1uM *EhJAB1*  
 400nM *EhMIF*

|   |   |   |   |
|---|---|---|---|
| - | + | + | + |
| - | - | + | - |
| - | - | - | + |
| + | + | + | + |

Figure 2F- Top Panel

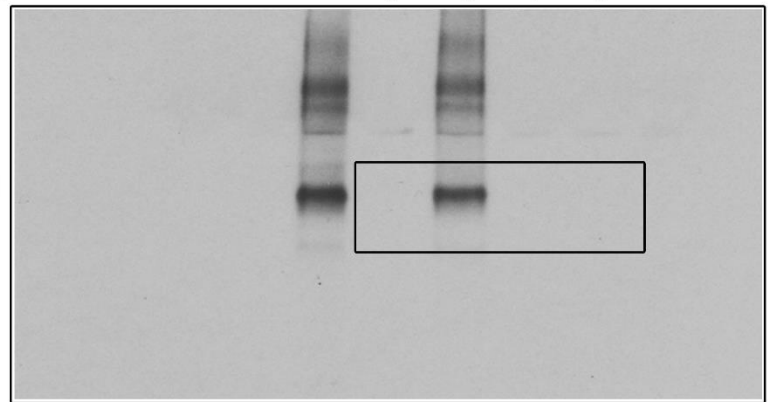

*EhJAB1*<sup>B</sup>

Figure 2F-Bottom Panel

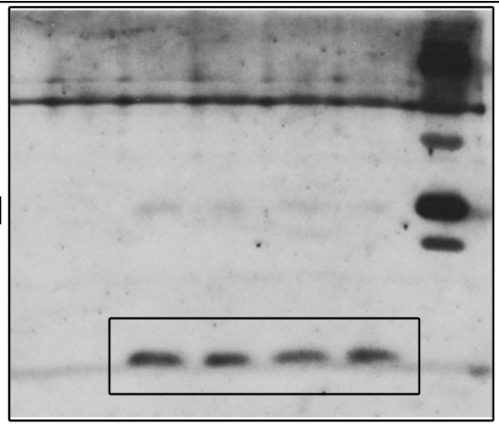

*EhMIF*

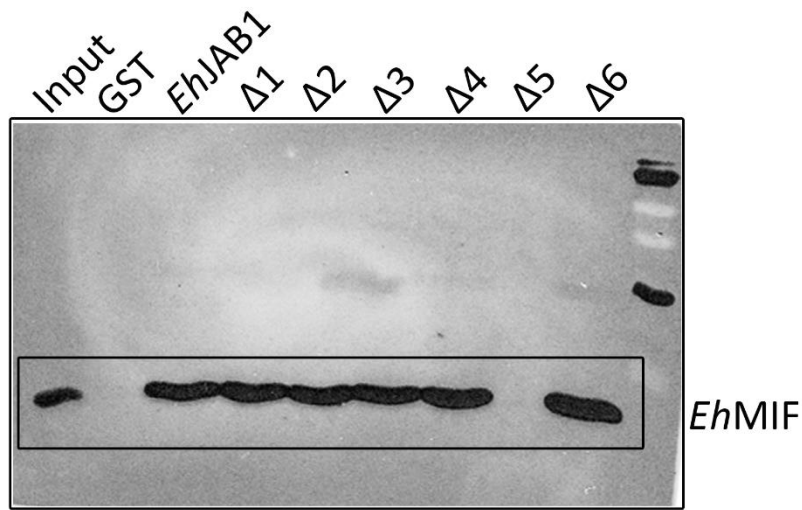

Figure 4C

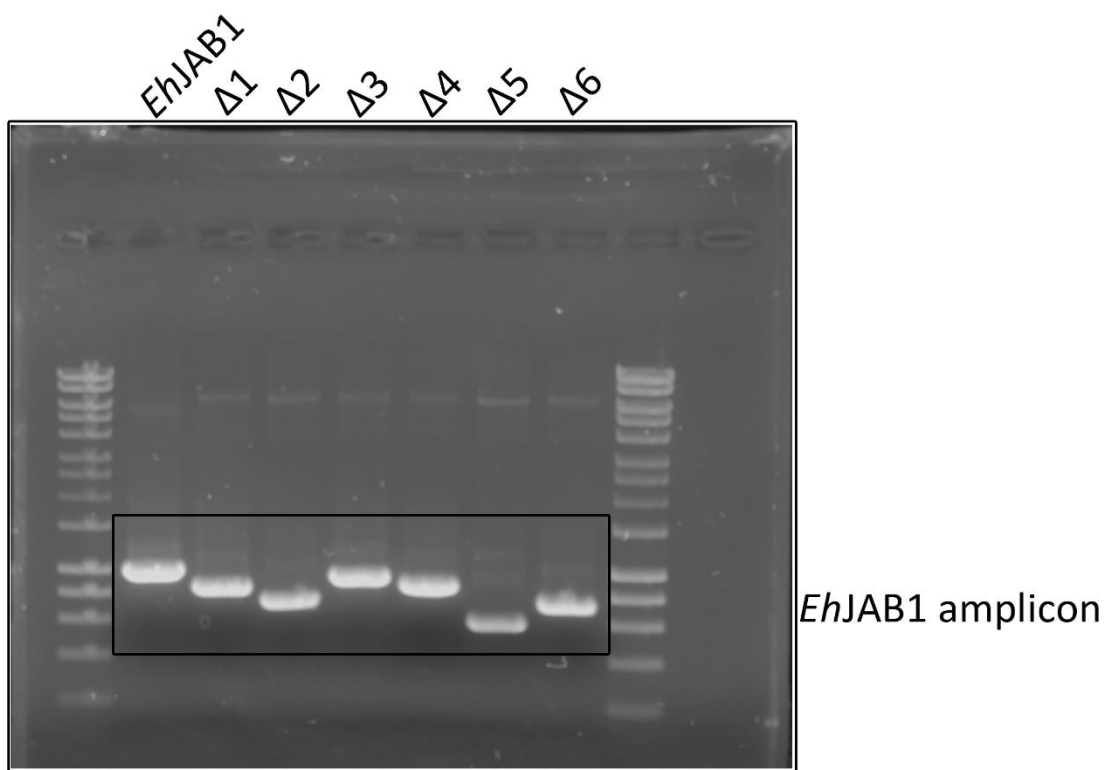

Figure 4D

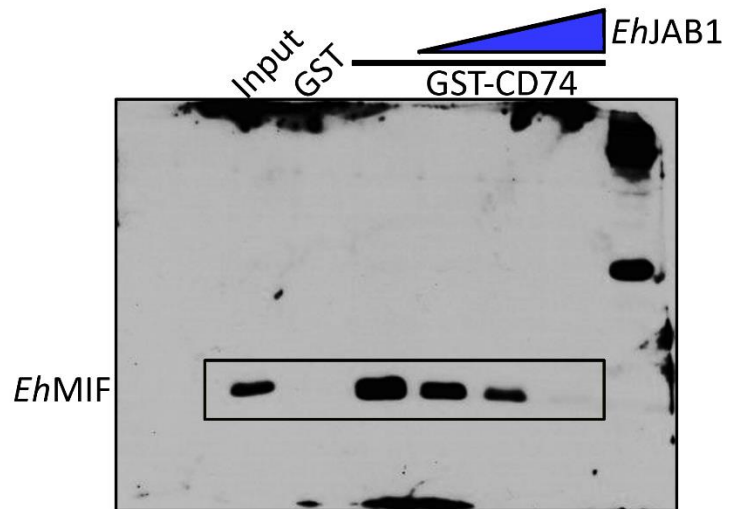

Figure 5A

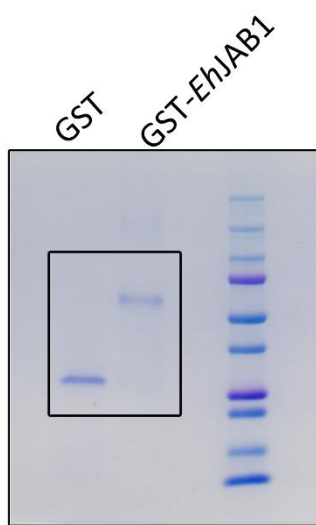

Figure 2B

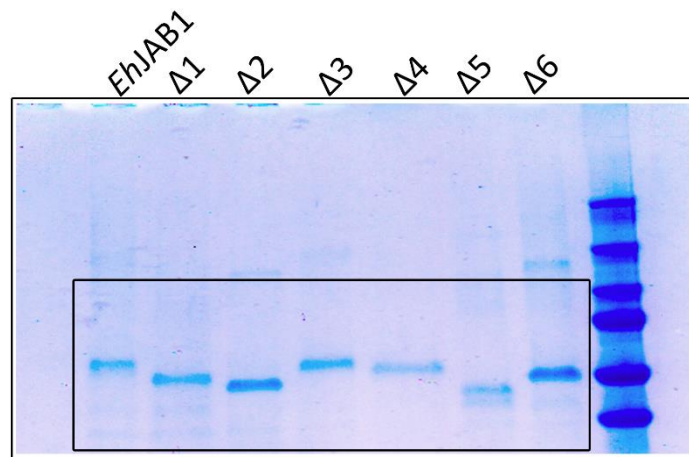

Figure 4C

Figure 3A and 3B raw data

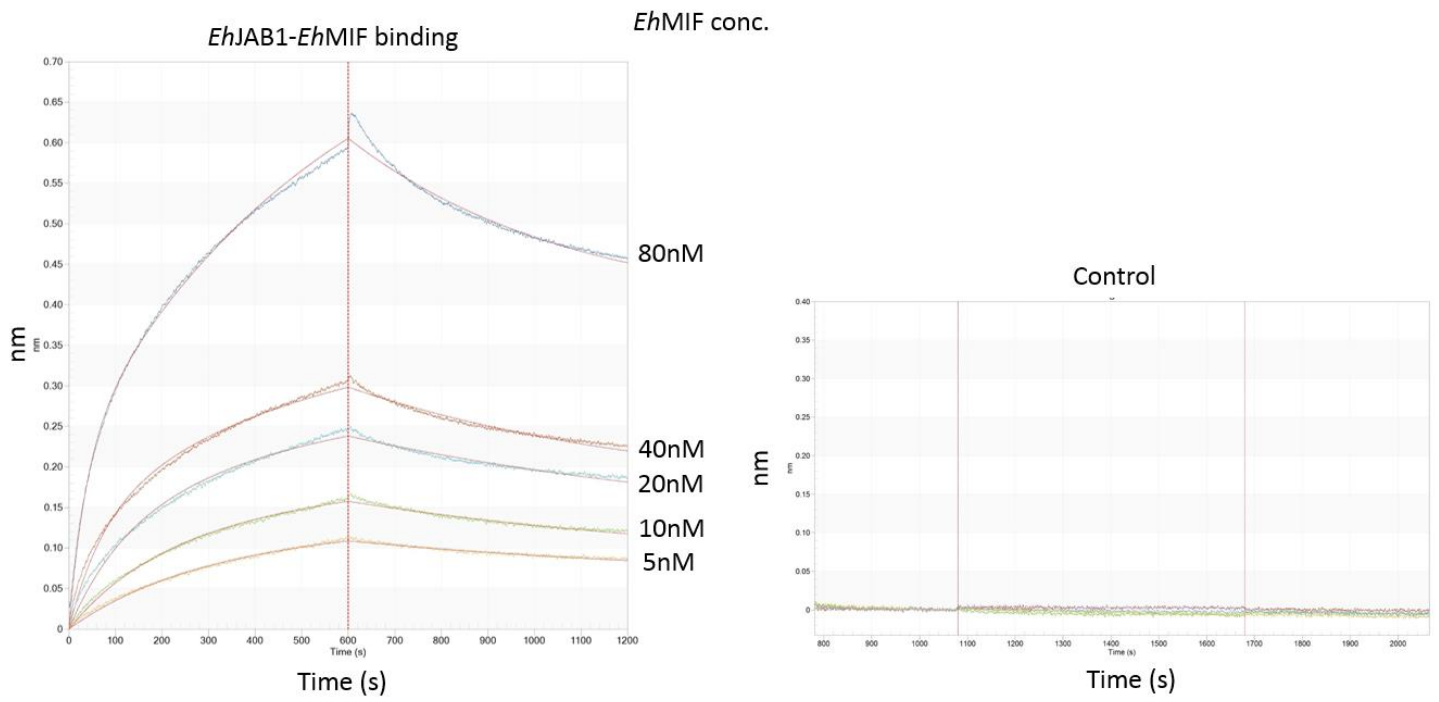

Supplement: 41598_2018_28625_MOESM1_ESM.pdf [file 41598_2018_28625_MOESM1_ESM.pdf]
